# Supplementary material for: Light Cross-Linkable Marine Collagen for Coaxial Printing of a 3D Model of Neuromuscular Junction Formation
Source: PubMed Central journal article supplement (PMC7823301; doi:10.3390/biomedicines9010016), 2020-12-26
Supplement: biomedicines-09-00016-s001.pdf [file biomedicines-09-00016-s001.pdf]

## Supplementary Information

### Light Cross-linkable Marine Collagen for Coaxial Printing of a 3D Model of Neuromuscular Junction Formation

Borja Sanz<sup>1,2</sup>, Ane Albillos Sanchez<sup>1,2</sup>, Bonnie Tangey<sup>1</sup>, Kerry Gilmore<sup>1</sup>, Zhilian Yue<sup>1</sup>, Xiao Liu<sup>1</sup>, Gordon Wallace<sup>1\*</sup>

<sup>(1)</sup> ARC Centre of Excellence for Electromaterials Science, Intelligent Polymer Research Institute, AIIM Facility, Innovation Campus, University of Wollongong, Squires Way, Wollongong, New South Wales 2500, Australia.

<sup>(2)</sup> Current address: Department of Orthopedics, University Medical Center Utrecht, Utrecht, 3508 GA, The Netherlands.

#### \*Corresponding Author

E-mail: [gwallace@uow.edu.au](mailto:gwallace@uow.edu.au)

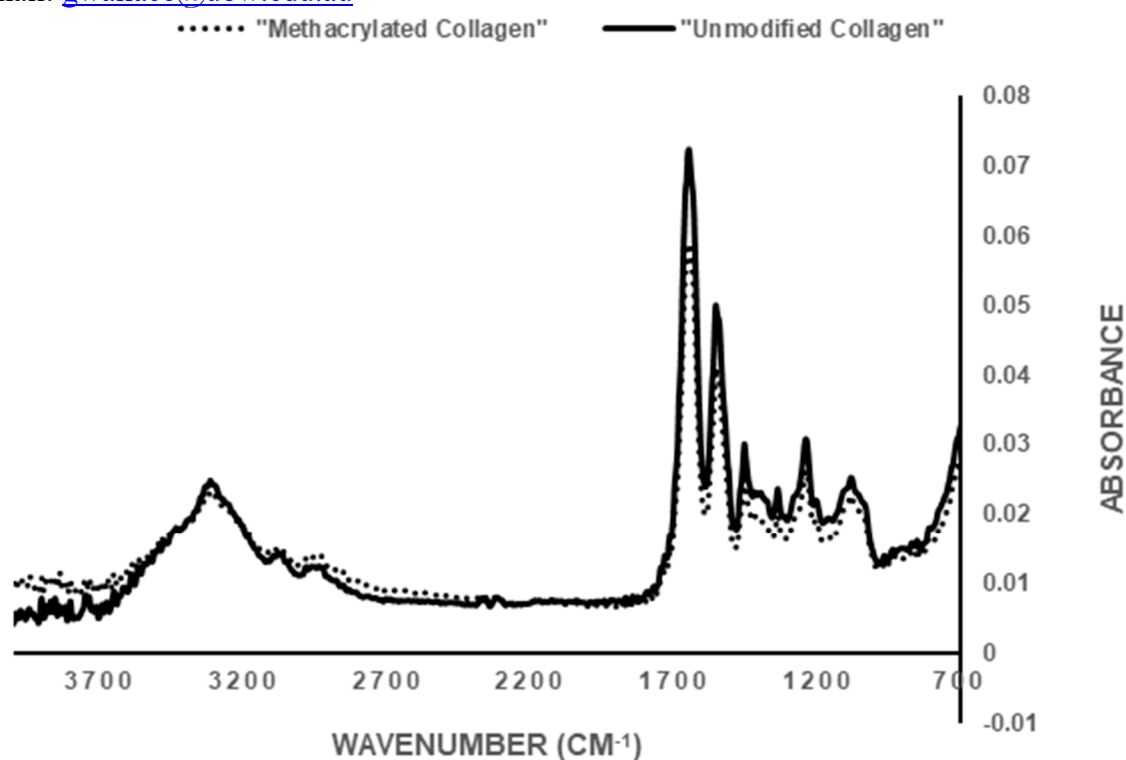

Figure 1. Comparison of FTIR spectra of extracted marine-derived collagen with (dotted line) and without (solid line) methacrylation. Samples were tested as freeze-dried foams at room temperature
